# Supplementary material for: Sustained delivery of anti-VEGFs from thermogel depots inhibits angiogenesis without the need for multiple injections
Source: Royal Society of Chemistry journal article supplement (doi:10.1039/c9bm01049a), 2019-01-01
Supplement: c9bm01049a1.pdf [file c9bm01049a1.pdf]

### Supporting information

#### **Sustained delivery of anti-VEGFs from thermogel depots inhibits angiogenesis without the need for multiple injections**

Kun Xue<sup>1,#</sup>, Xinxin Zhao<sup>2,#</sup>, Zhongxing Zhang<sup>1</sup>, Beiyong Qiu<sup>2</sup>, Queenie Shu Woon Tan<sup>2</sup>, Kok Haur Ong<sup>2</sup>, Zengping Liu<sup>3,4</sup>, Bhav Harshad Parikh<sup>2,3</sup>, Veluchamy Amutha Barathi<sup>3,4,5</sup>, Weimiao Yu<sup>2</sup>, Xiaomeng Wang<sup>2,4,6</sup>, Gopal Lingam<sup>3</sup>, Walter Hunziker<sup>2</sup>, Xinyi Su<sup>2,3,4\*</sup>, Xian Jun Loh<sup>1,4,7\*</sup>

1. Institute of Materials Research and Engineering (IMRE), Agency for Science, Technology and Research (A\*STAR), 2 Fusionopolis Way, #08-03 Innovis, Singapore 138634, Singapore
2. Institute of Molecular and Cell Biology (IMCB), Agency for Science, Technology and Research (A\*STAR), 61 Biopolis Drive Proteos Singapore 138673, Singapore
3. Department of Ophthalmology, Yong Loo Lin School of Medicine, National University of Singapore, 1E Kent Ridge Road, NUHS Tower Block, Level 7, Singapore 119228
4. Singapore Eye Research Institute, 11 Third Hospital Avenue, Singapore 168751, Singapore
5. Academic Clinical Program in Ophthalmology, DUKE-NUS Graduate School of Medicine
6. Lee Kong Chian School of Medicine, Nanyang Technological University Singapore, 59 Nanyang Drive, 636921, Singapore
7. Department of Materials Science and Engineering, National University of Singapore, 9 Engineering Drive 1, Singapore 117575, Singapore

# These authors contributed equally to this work

\* Correspondence to Xinyi Su ([xysu@imcb.a-star.edu.sg](mailto:xysu@imcb.a-star.edu.sg)); X. J. Loh ([lohxj@imre.a-star.edu.sg](mailto:lohxj@imre.a-star.edu.sg))

## Supplementary figures

| Copolymer name | PEG:PPG ratio (wt%) | Feed ratio (wt%) |       |      | Actual ratio by <sup>1</sup> H NMR (wt%) |       |      |
|----------------|---------------------|------------------|-------|------|------------------------------------------|-------|------|
|                |                     | PEG              | PPG   | PCL  | PEG                                      | PPG   | PCL  |
| EPC 1:1        | 1.05                | 49.50            | 49.50 | 0.99 | 48.41                                    | 50.68 | 0.91 |
| EPC 2:1        | 2.13                | 33.00            | 66.01 | 0.99 | 31.66                                    | 67.36 | 0.98 |
| EPC 4:1        | 4.28                | 19.80            | 79.21 | 0.99 | 18.74                                    | 80.27 | 0.99 |
| EPC 6:1        | 6.32                | 14.14            | 84.87 | 0.99 | 13.53                                    | 85.54 | 0.93 |

**Table S1.** List of <sup>1</sup>H NMR results for 4 different copolymers.

| S/N | Sample ID | Concentration of polymer in thermogel |                 |                     |                 |                     |                 |
|-----|-----------|---------------------------------------|-----------------|---------------------|-----------------|---------------------|-----------------|
|     |           | 3wt%                                  |                 | 7wt%                |                 | 12wt%               |                 |
|     |           | Crossover temp (°C)                   | G' at 37°C (Pa) | Crossover temp (°C) | G' at 37°C (Pa) | Crossover temp (°C) | G' at 37°C (Pa) |
| 1   | EPC 1:1   | No, Paste-like                        | 0.04            | 10.75               | 379.46          | 7.86                | 2139.46         |
| 2   | EPC 2:1   | 29.62                                 | 0.84            | 15.76               | 295.91          | 12.34               | 1612.39         |
| 3   | EPC 4:1   | No, Solution                          | 0.022           | 35.24               | 30.08           | 27.18               | 359.36          |
| 4   | EPC 6:1   | No, Solution                          | 0.009           | No, Solution        | 0.19            | No, Solution        | 18.27           |

**Table S2.** Rheological characterisation of various PEG:PPG ratios of thermogel by temperature ramp at different weight percent of polymer.

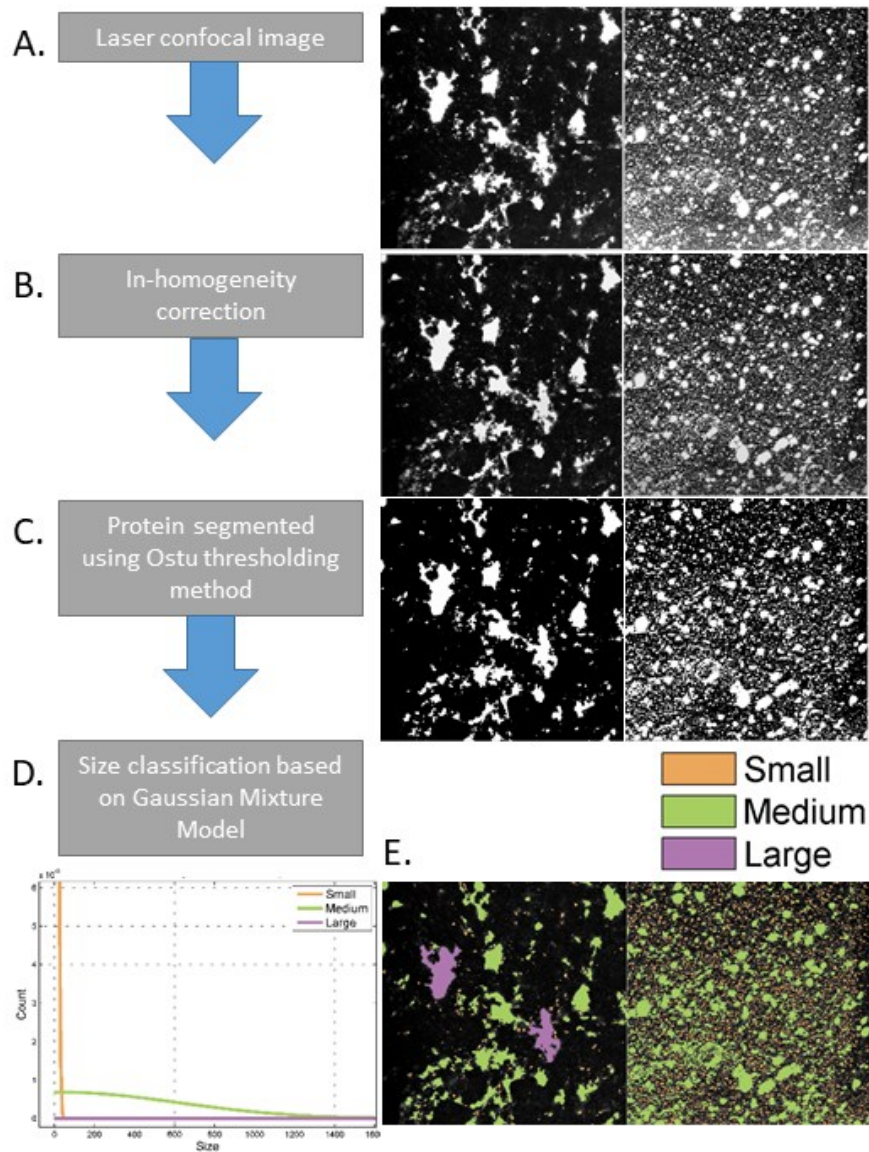

**Figure S1.** Confocal image processing and analysis pipeline. First, the green fluorescein channel in the images will be processed for inhomogeneity correction. The image after the inhomogeneity correction (see Fig. 1B) will be used as input for image binarization. An optimized thresholding value was determined to binarize the image (see Fig. 1C) based on Otsu thresholding method. Hence, a segmented fluorescent protein domain in binary image format is obtained. The region properties such as area (in pixel) extracted from all images were collected. All sizes feature were used to construct the domain size classification model (see Fig. 1D) using expectation–maximization (EM) algorithm. An estimated mean and standard deviation for three clusters will be obtained based on EM method above. The three mode Gaussian mixture model (GMM) was generated based on the estimated mean and standard deviation. Subsequently, all sizes extracted will be used to classify the domain into "small", "medium", and "large" category (see Fig. 1E) based on the GMM accordingly. The average protein domain sizes in  $\mu\text{m}^2$  were then calculated and quantified accordingly.

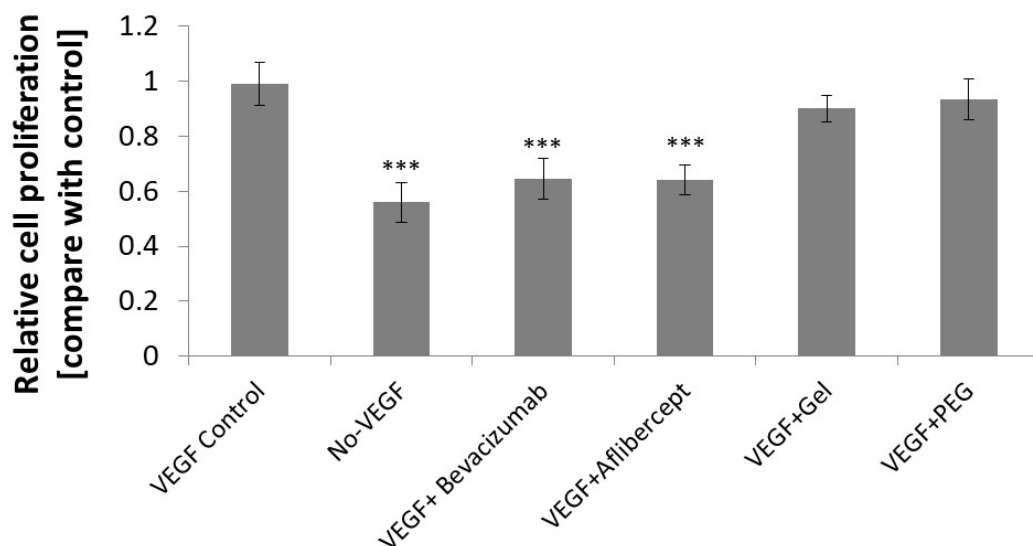

**Figure S2.** Anti-VEGF controls inhibit VEGF-induced HUVEC proliferation in vitro. HUVECs were treated with the VEGF only control, as well as anti-VEGF and thermogel separately. Cell proliferation was evaluated by WST-8 assay and compared with control (VEGF control) (n = 6). (\* P < 0.05; \*\* P < 0.01; \*\*\* P < 0.005)

| Sample collecting time | 5 days    | 10 days   | 20 days   | 40 days   |
|------------------------|-----------|-----------|-----------|-----------|
| Dissociated thermogel  | 0 ± 1.4   | 0 ± 1,5   | 1.4 ± 3.6 | 2.3 ± 1.8 |
| Released Bevacizumab   | 0.3 ± 2.1 | 0 ± 2.9   | 1.6 ± 2.1 | 1.4 ± 1.4 |
| Released Aflibercept   | 0.2 ± 1.4 | 0.8 ± 5.0 | 0 ± 4.6   | 3.2 ± 0.7 |

**Table S3.** Percentage of HUVEC cell death (Compared with none- treated control) after 3 days co-culture with In vitro release samples (LDH cell death assay)
